# Supplementary material for: Increased mast cell activation in eosinophilic chronic obstructive pulmonary disease
Source: PubMed Central journal article supplement — Clin Transl Immunology. 2022 Sep 26;11(9):e1417. doi: 10.1002/cti2.1417 (PMC9512688; doi:10.1002/cti2.1417), 2022-09-26
Supplement: CTI2-11-e1417-s001.pdf [file CTI2-11-e1417-s001.pdf]

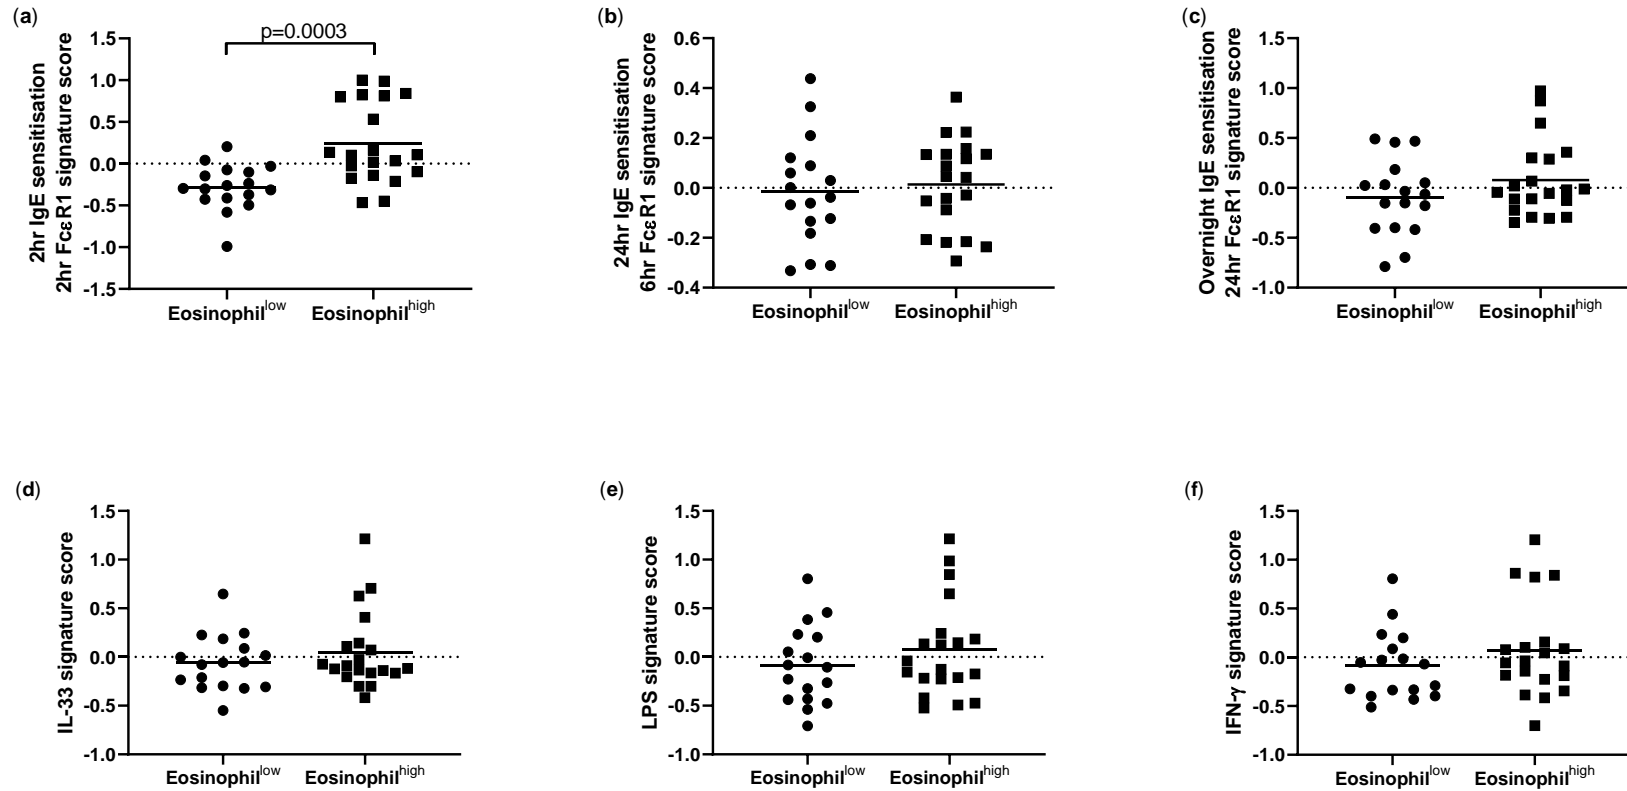

**Supplementary figure 1. Bronchial brushing mast cell gene expression in eosinophil<sup>low</sup> and eosinophil<sup>high</sup> COPD patients.** RNA sequencing was used to examine the expression of (a - c) acute IgE signatures, (d) IL-33 signature, (e) LPS signature, and (f) IFN- $\gamma$  signature in  $n = 17$  eosinophil<sup>low</sup> and  $n = 20$  eosinophil<sup>high</sup> COPD patients. Data presented as individual values where the black horizontal line represents the median.

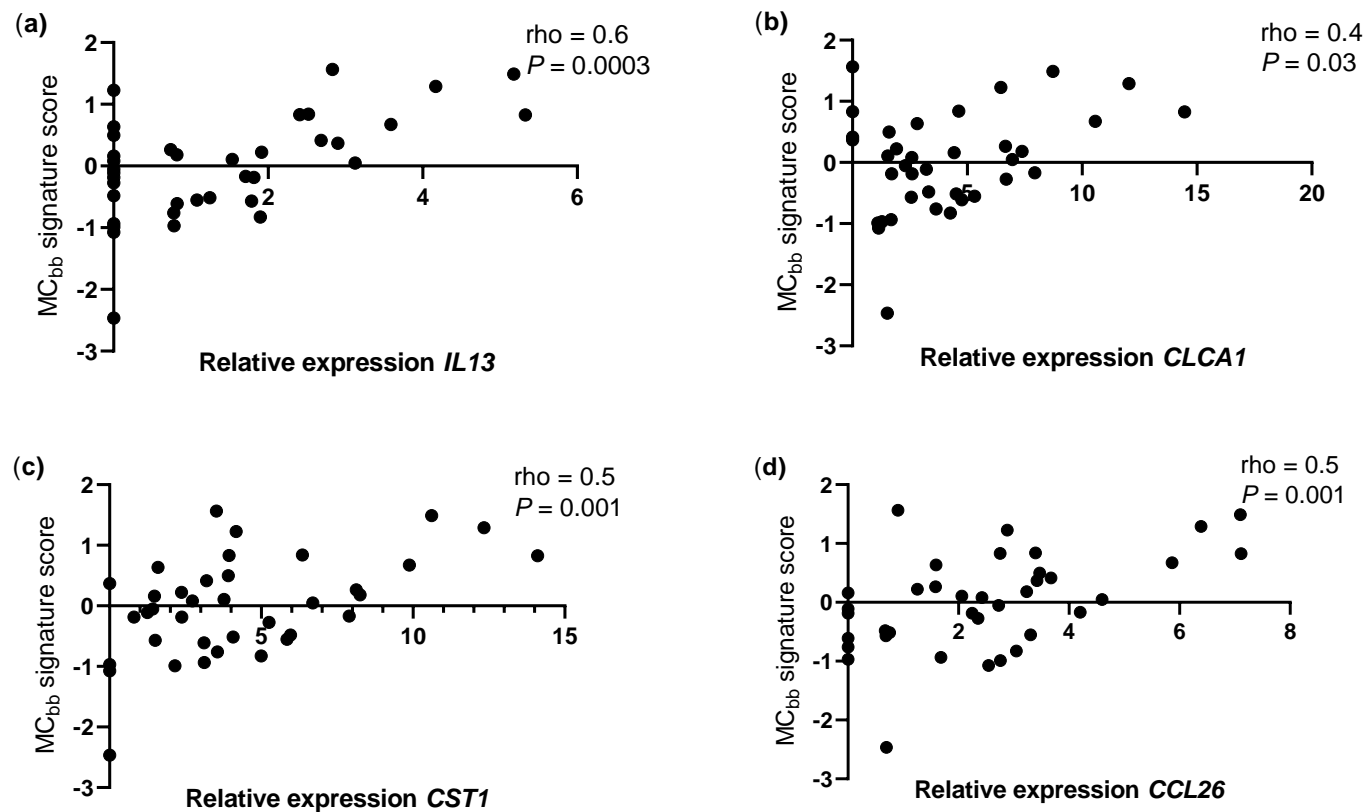

**Supplementary figure 2. Correlations between bronchial brushing mast cell gene expression and T2 biomarkers.** RNA sequencing was used to examine correlations between the  $MC_{bb}$  signature and (a) *IL13*, (b) *CLCA1*, (c) *CST1*, and (d) *CCL26*. Data analysed by Spearman correlation.

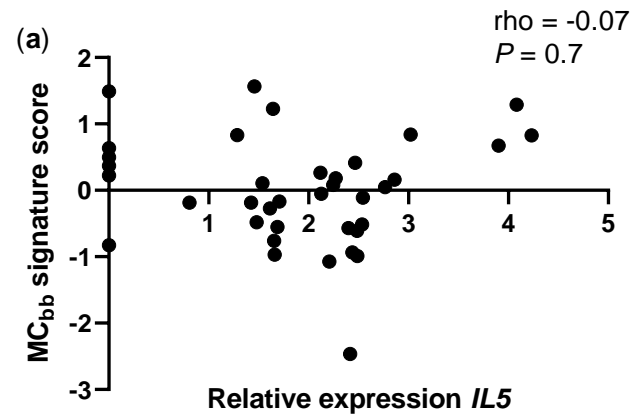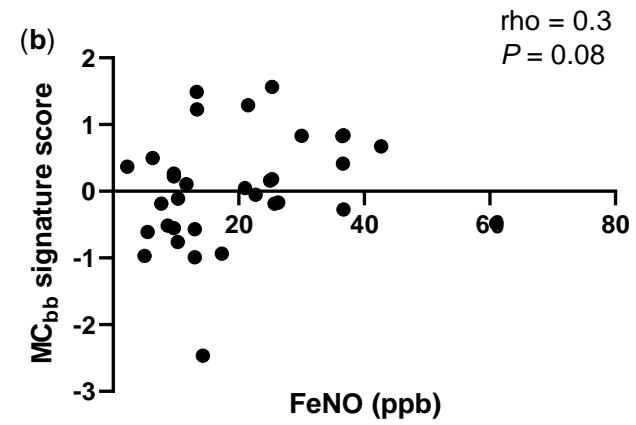

**Supplementary figure 3. Correlations between bronchial brushing mast cell gene expression and T2 biomarkers.** RNA sequencing was used to examine correlations between the MC<sub>bb</sub> signature and (a) *IL5* and (b) FeNO. Data analysed by Spearman correlation.

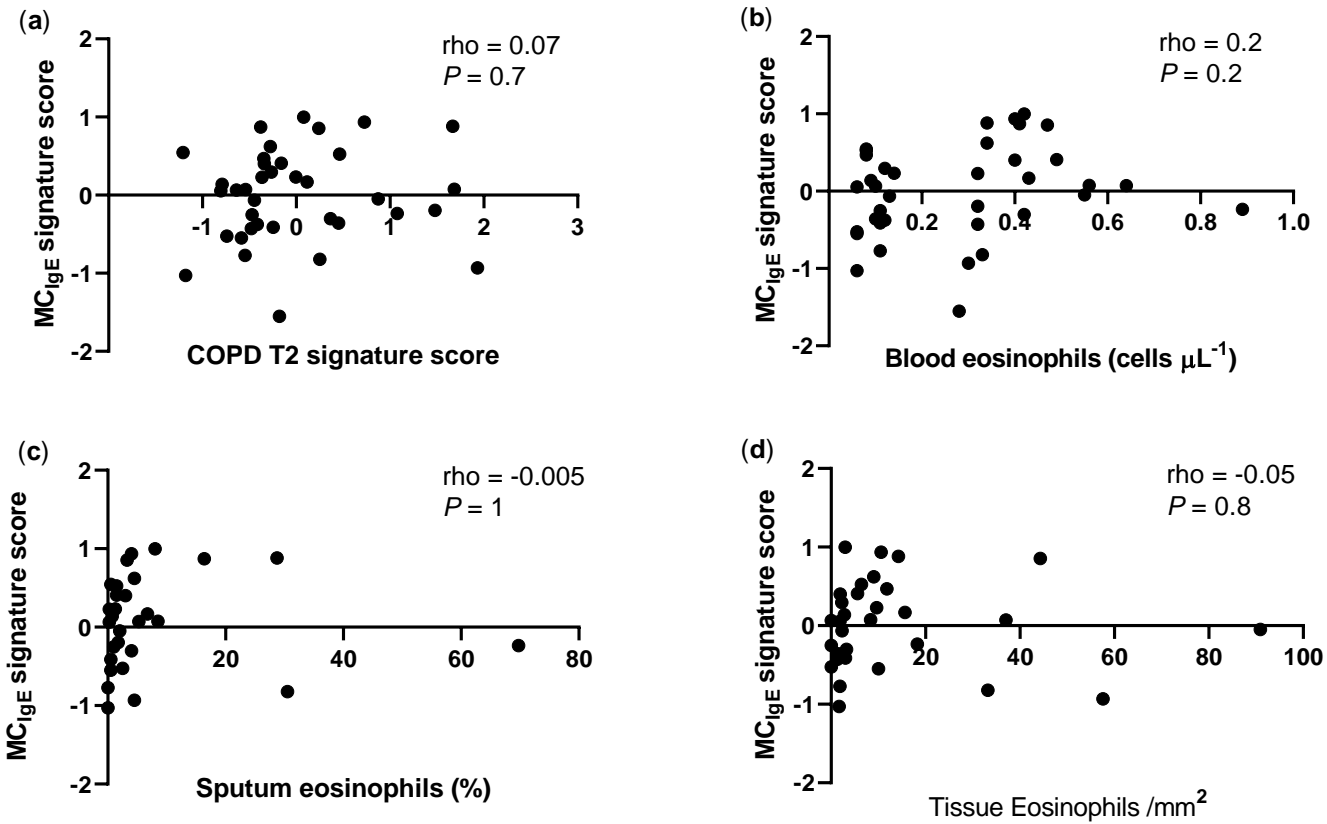

**Supplementary figure 4. Correlations between bronchial brushing mast cell gene expression and T2 biomarkers.** RNA sequencing was used to examine correlations between the MC<sub>IgE</sub> signature and (a) COPD T2 signature, (b) blood eosinophils, (c) sputum eosinophils, and (d) bronchial biopsy eosinophils. Data analysed by Spearman correlation.

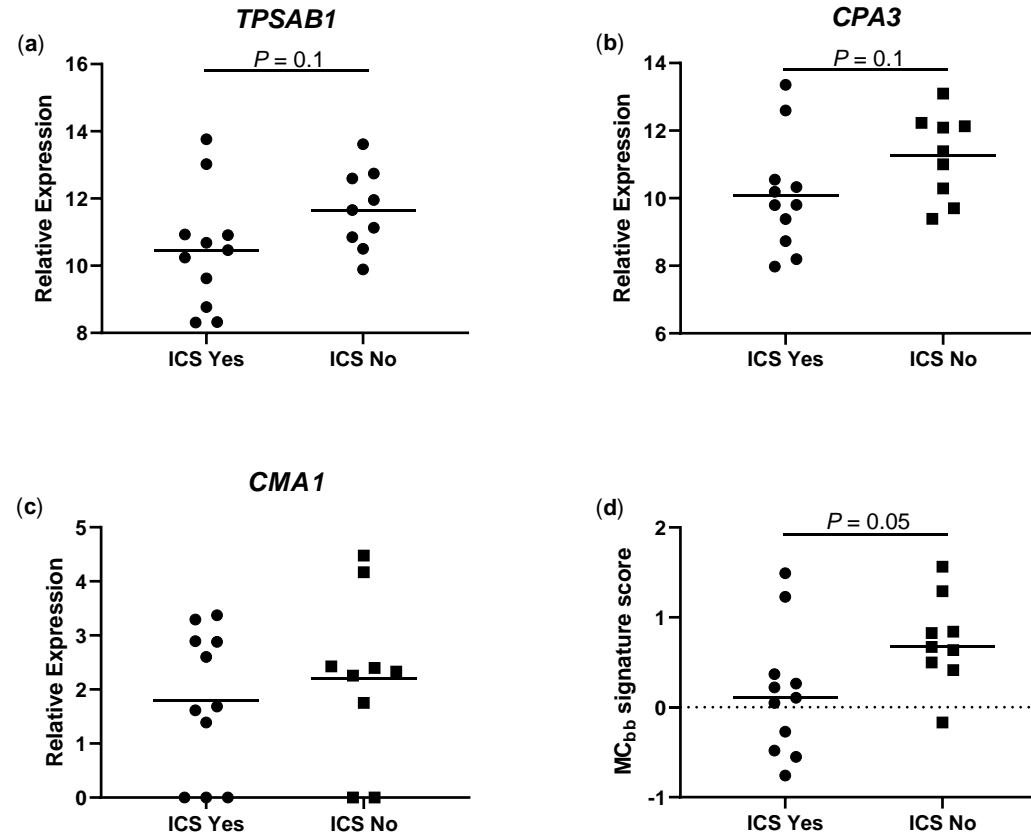

**Supplementary figure 5. Bronchial brushing mast cell gene expression in ICS users and non-users in the eosinophil<sup>high</sup> group only.** RNA sequencing was used to examine the expression of (a) *TPSAB1*, (b) *CPA3*, (c) *CMA1*, and (d) *MC<sub>bb</sub>* signature in ICS users (ICS yes; n=11) vs non-users (ICS no; n=9). Data presented as individual values where the black horizontal line represents the mean (a – c) or median (d).

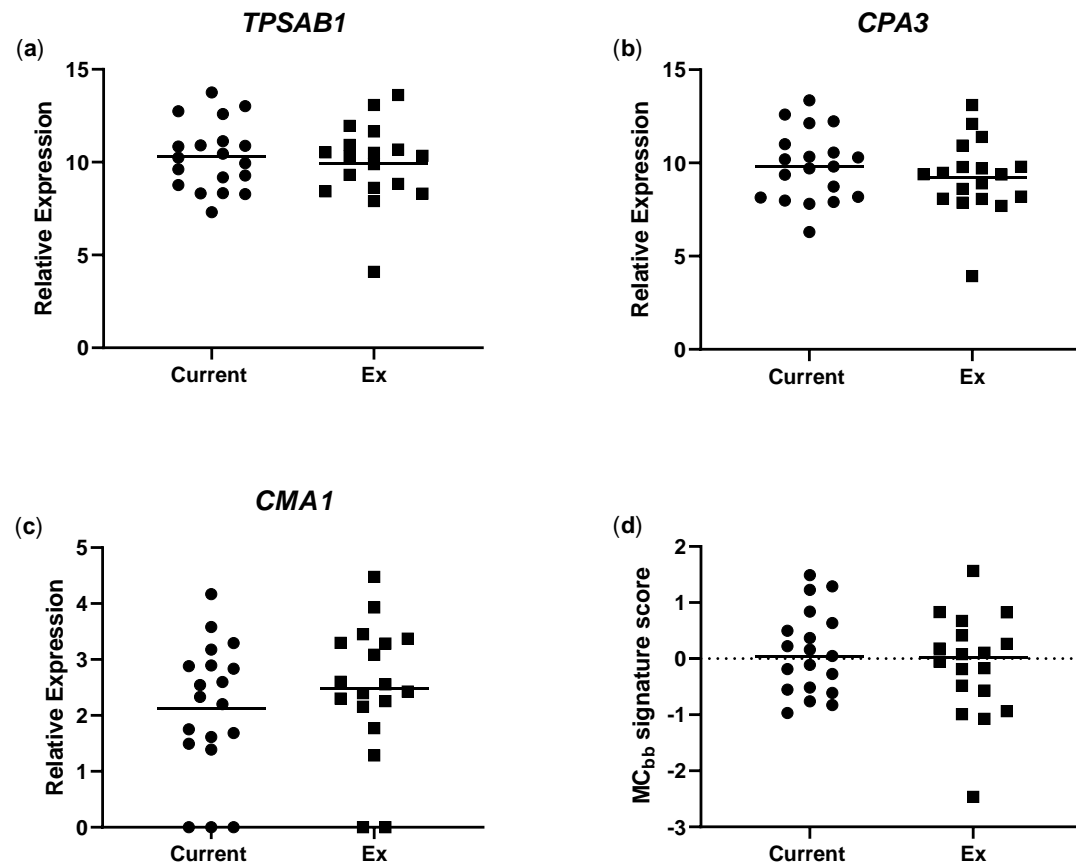

**Supplementary figure 6. Bronchial brushing mast cell gene expression in current vs ex-smokers.** RNA sequencing was used to examine the expression of (a) *TPSAB1*, (b) *CPA3*, (c) *CMA1*, (d)  $MC_{bb}$  signature signature in current smokers (n=19) vs ex-smokers (n=18). Data presented as individual values where the black horizontal line represents the mean (a – c) or median (d).

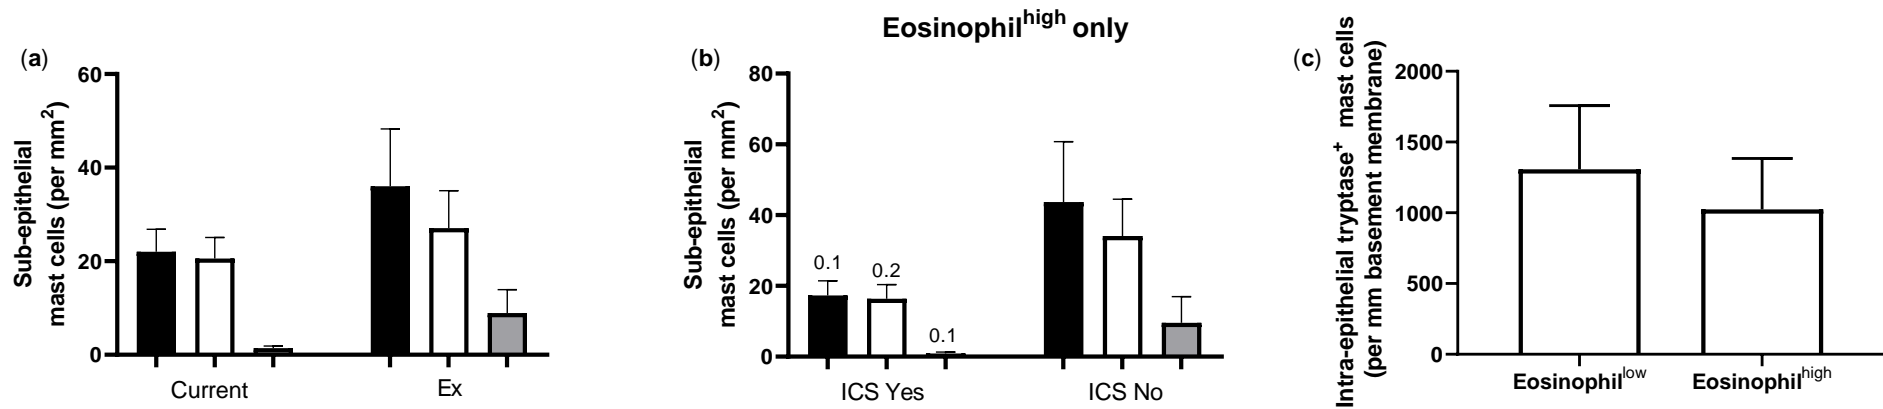

**Supplementary figure 7. Mast cell quantification in bronchial biopsies.** The number of sub-epithelial tryptase<sup>+</sup> (M<sub>T</sub>), tryptase<sup>+</sup>chymase<sup>+</sup> (M<sub>TC</sub>) and the total number of mast cells (M<sub>T</sub> + M<sub>TC</sub>) were quantified by immunofluorescence and counts were normalised to area. Comparisons were made between current vs ex-smokers (**a**; n=12 vs n=11) ICS users vs non-users in the eosinophil<sup>high</sup> group only (**b**; n=7 vs n=6). The number of intra-epithelial tryptase<sup>+</sup> mast cells were quantified by immunohistochemistry and counts were normalised to basement membrane length (**c**).

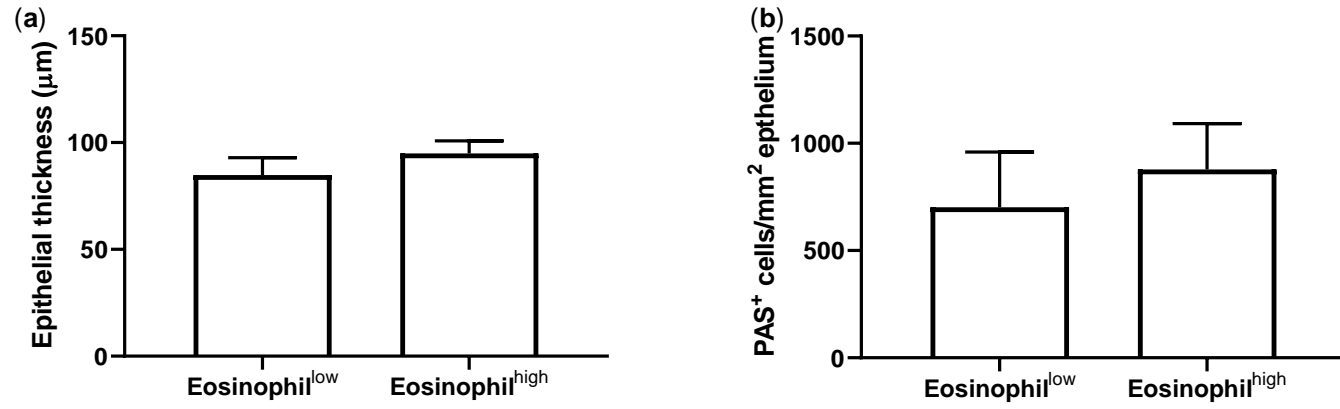

**Supplementary figure 8. Other histological measures in bronchial biopsies.** The epithelial thickness (a) and the number of PAS<sup>+</sup> cells (b) were compared between groups.



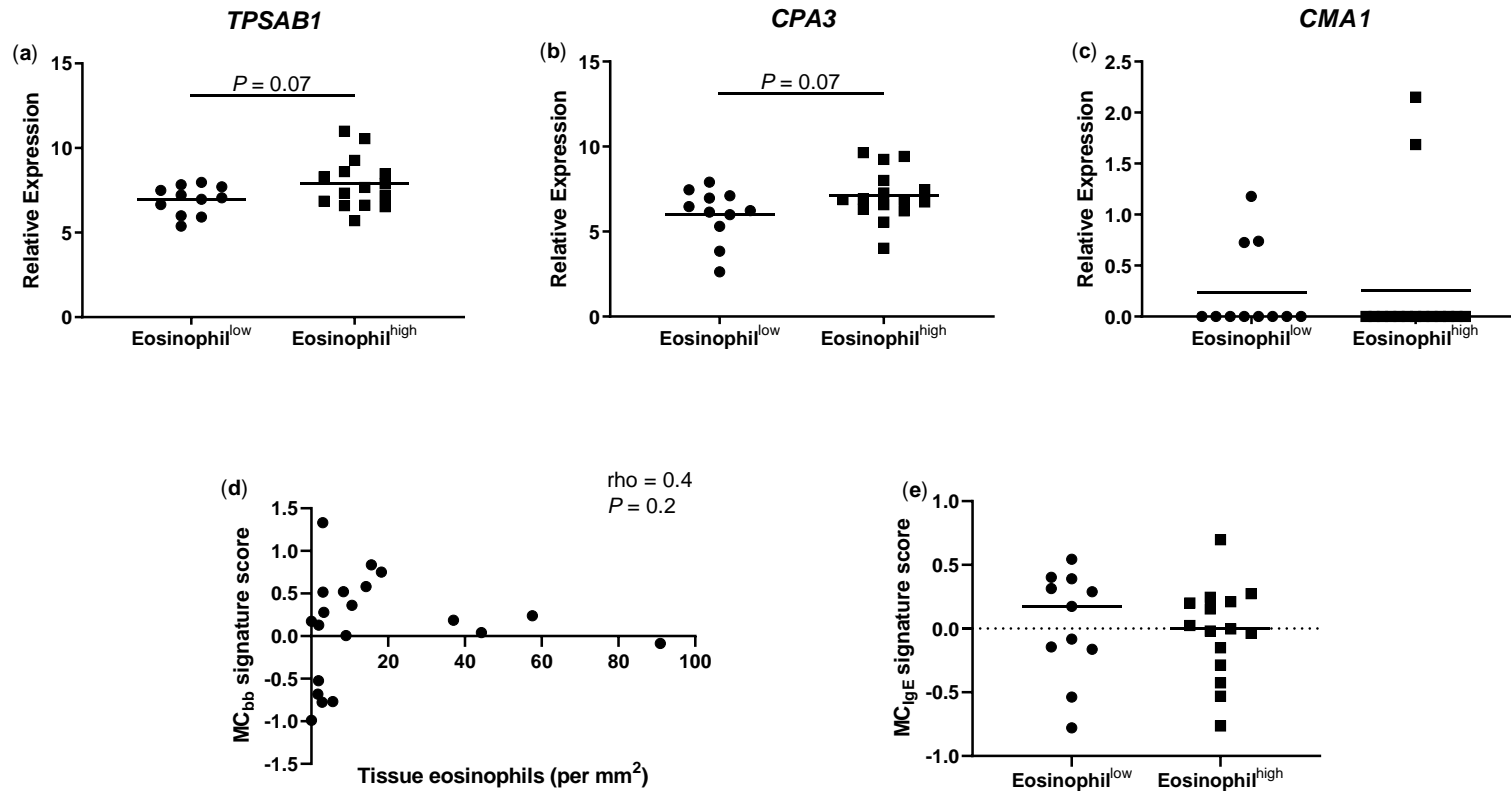

**Supplementary figure 9. Sputum mast cell gene expression in eosinophil<sup>low</sup> and eosinophil<sup>high</sup> COPD patients.** RNA sequencing was used to examine the expression of (a) *TPSAB1*, (b) *CPA3*, (c) *CMA1*, (d) correlations between the MC<sub>bb</sub> signature and bronchial biopsy eosinophils and (e) MC<sub>igE</sub> signature in n = 11 eosinophil<sup>low</sup> and n = 15 eosinophil<sup>high</sup> COPD patients.

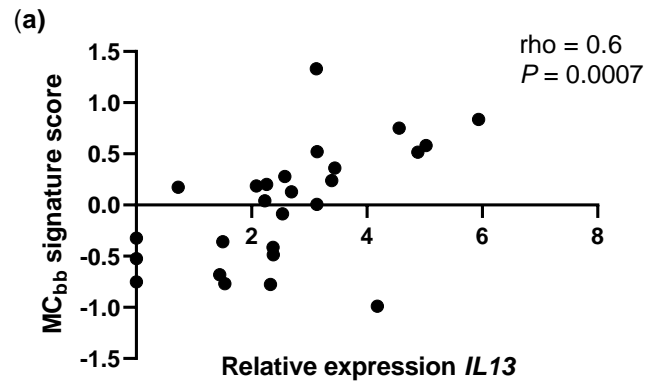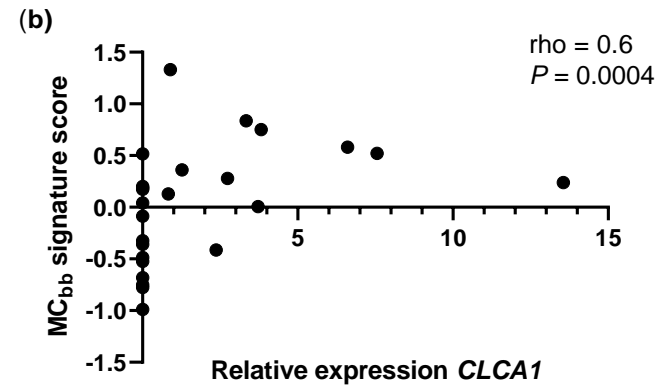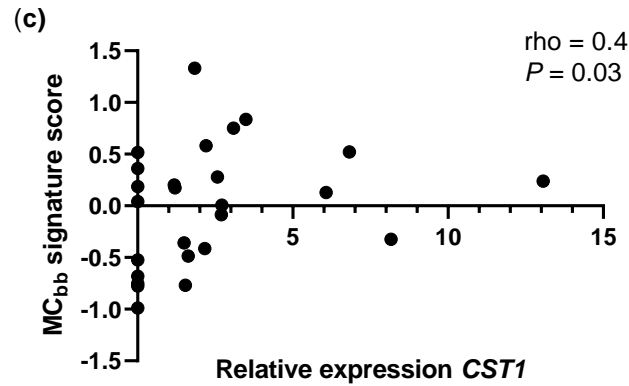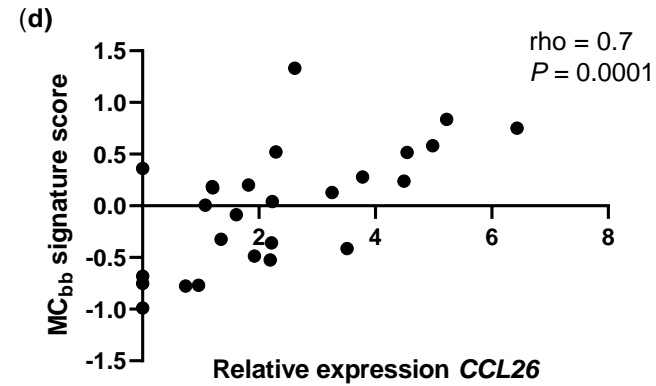

**Supplementary figure 10. Correlations between sputum mast cell gene expression and T2 biomarkers.** RNA sequencing was used to examine correlations between the MC<sub>bb</sub> signature and (a) *IL13*, (b) *CLCA1*, (c) *CST1*, and (d) *CCL26*. Data analysed by Spearman correlation.

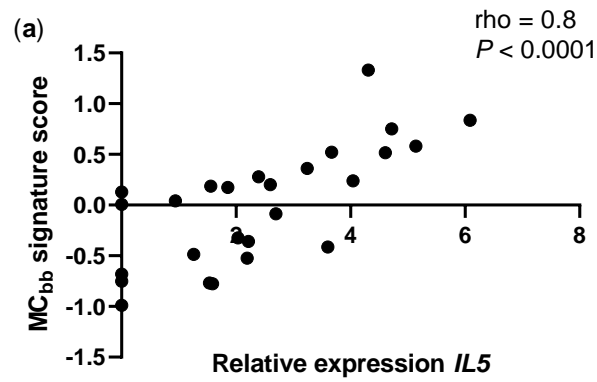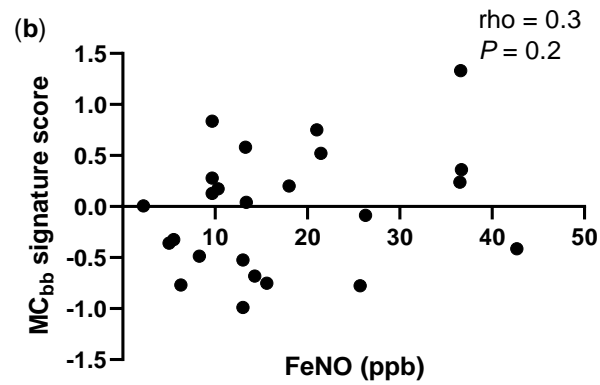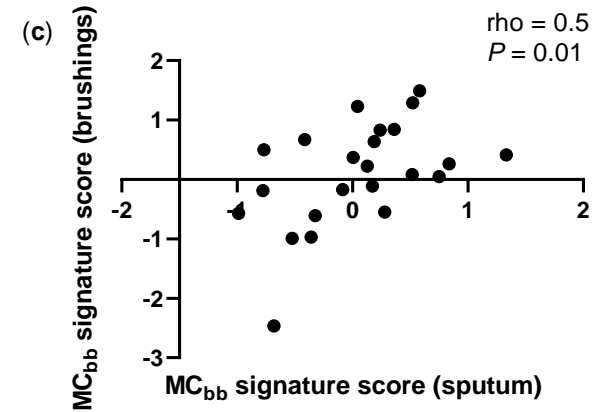

**Supplementary figure 11. Correlations between sputum mast cell gene expression and T2 biomarkers.** RNA sequencing was used to examine correlations between the MC<sub>bb</sub> signature and (a) *IL5*, (b) FeNO (c) bronchial brushing mast cell signature. Data analysed by Spearman correlation.

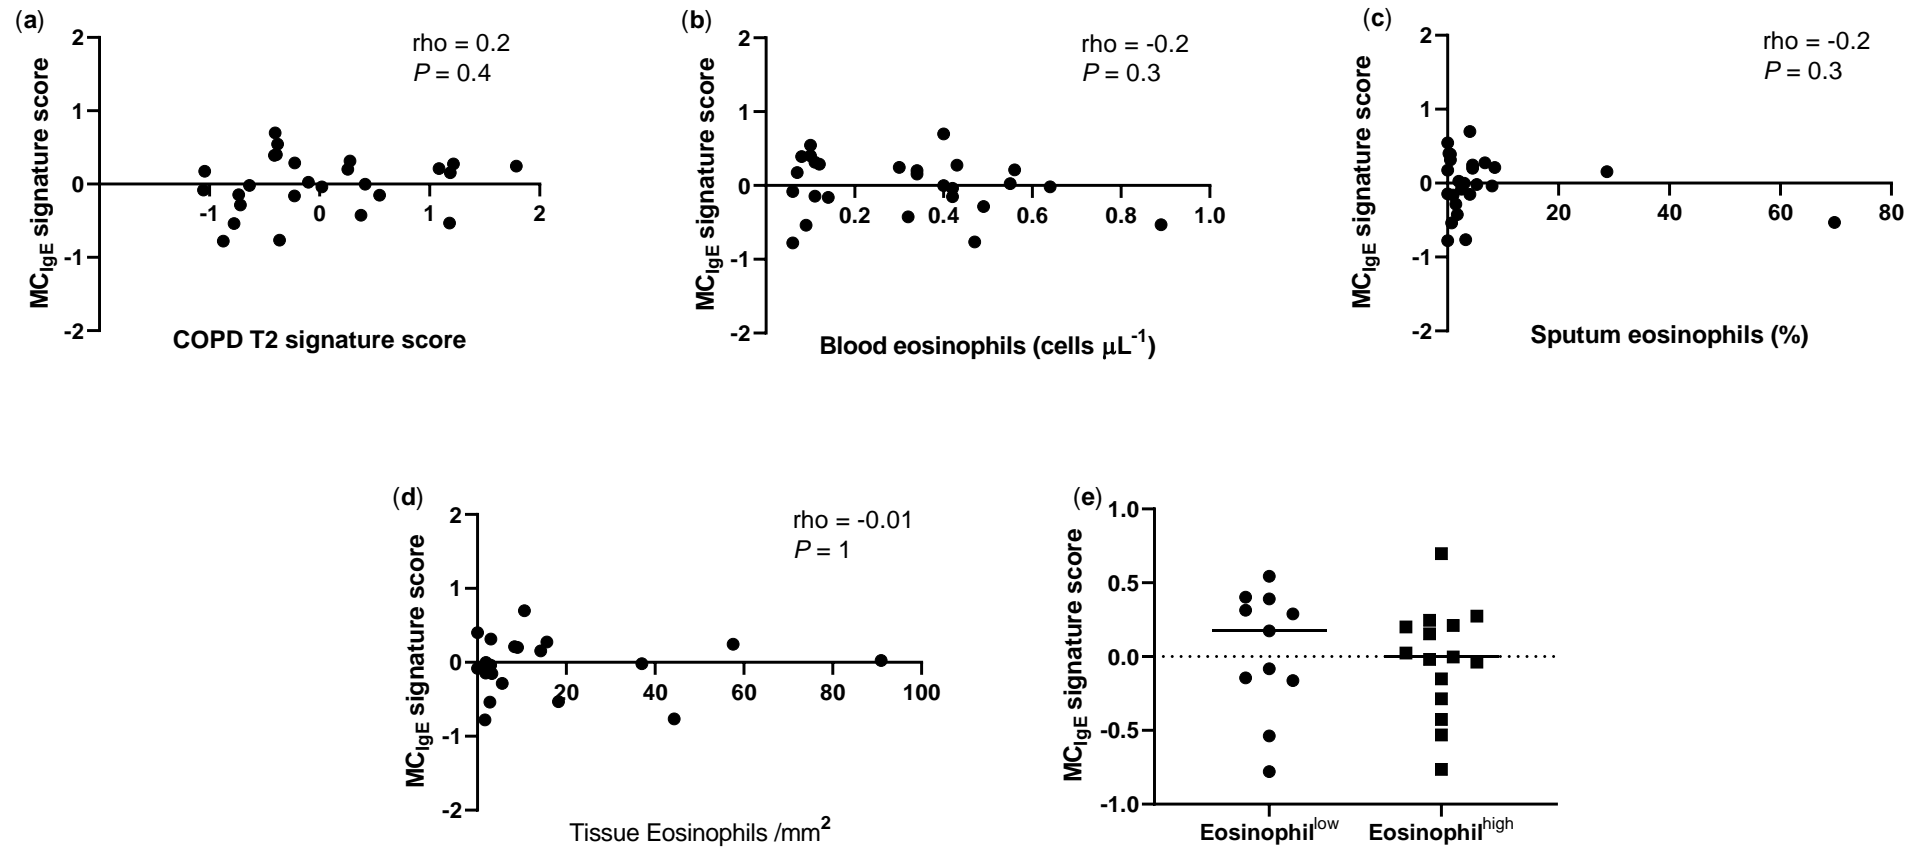

**Supplementary figure 12. Sputum MC<sub>IgE</sub> gene expression and T2 biomarkers.** RNA sequencing was used to examine correlations between the MC<sub>IgE</sub> signature and (a) COPD T2 signature, (b) blood eosinophils, (c) sputum eosinophils, and (d) bronchial biopsy eosinophils and compare MC<sub>IgE</sub> expression between eosinophil<sup>high</sup> and eosinophil<sup>low</sup> groups (e). Data analysed by Spearman correlation.

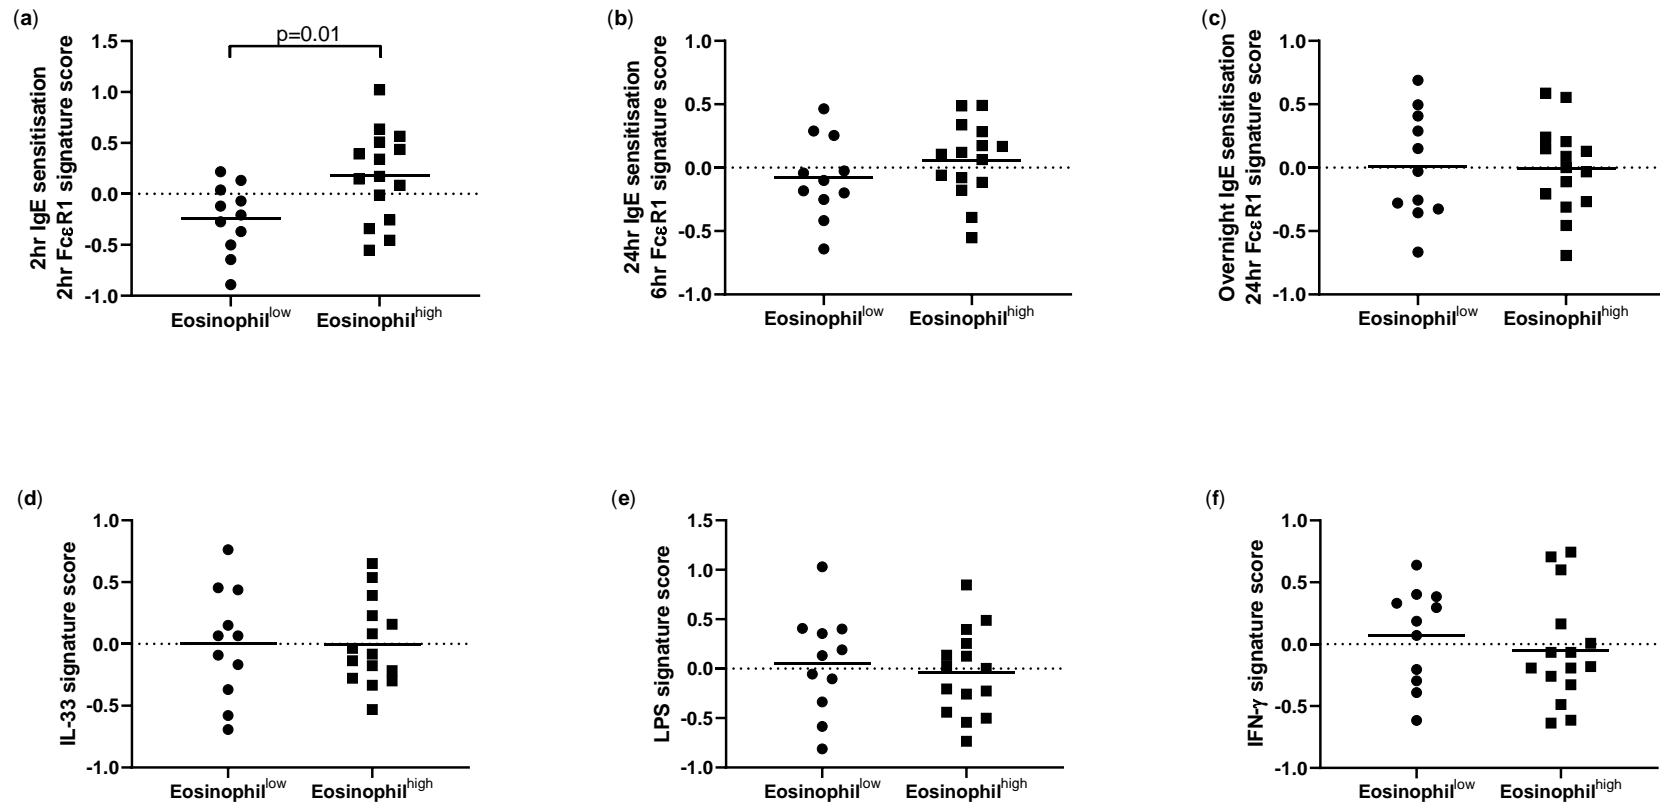

**Supplementary figure 13. Sputum mast cell gene expression in eosinophil<sup>low</sup> and eosinophil<sup>high</sup> COPD patients.** RNA sequencing was used to examine the expression of (a - c) acute IgE signatures, (d) IL-33 signature, (e) LPS signature, and (f) IFN-γ signature in n = 11 eosinophil<sup>low</sup> and n = 15 eosinophil<sup>high</sup> COPD patients. Data presented as individual values where the black horizontal line represents the median.

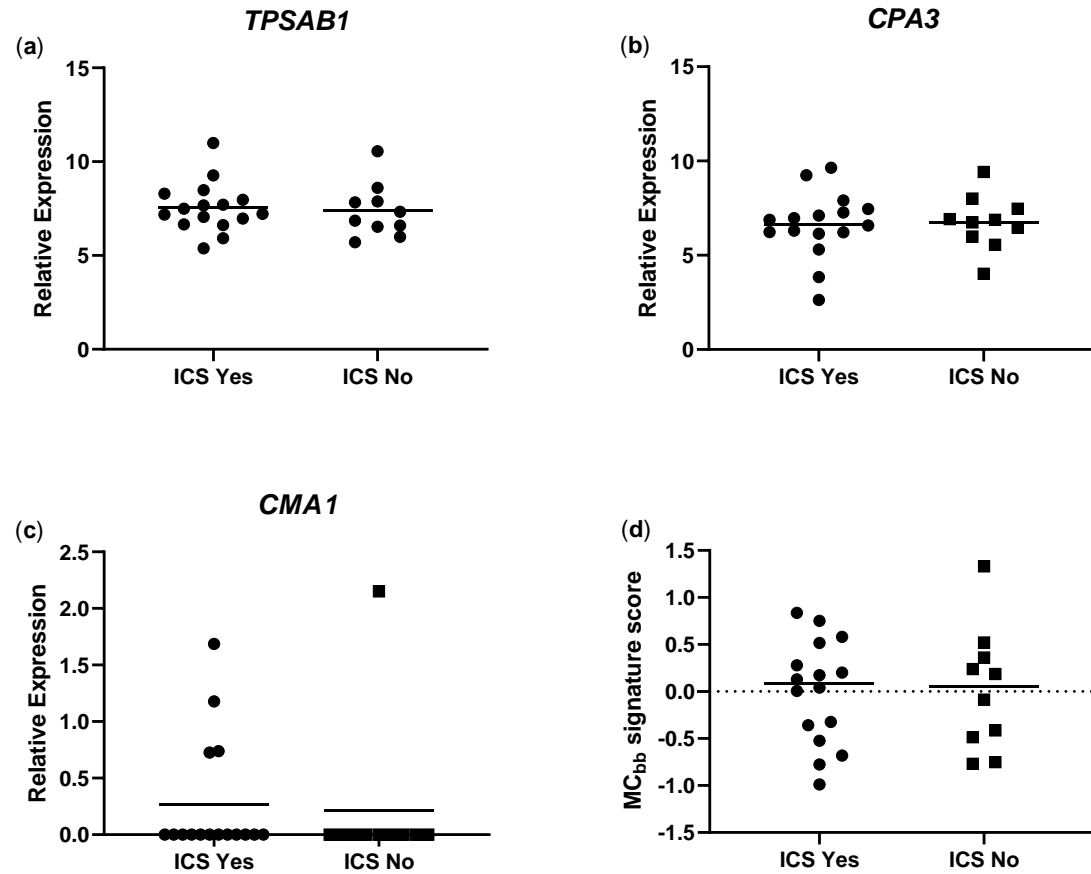

**Supplementary figure 14. Sputum mast cell gene expression in ICS users and non-users.** RNA sequencing was used to examine the expression of (a) *TPSAB1*, (b) *CPA3*, (c) *CMA1*, and (d) MC<sub>bb</sub> signature in ICS users (ICS yes; n=16) vs non-users (ICS no; n=10). Data presented as individual values where the black horizontal line represents the mean (a – c) or median (d).

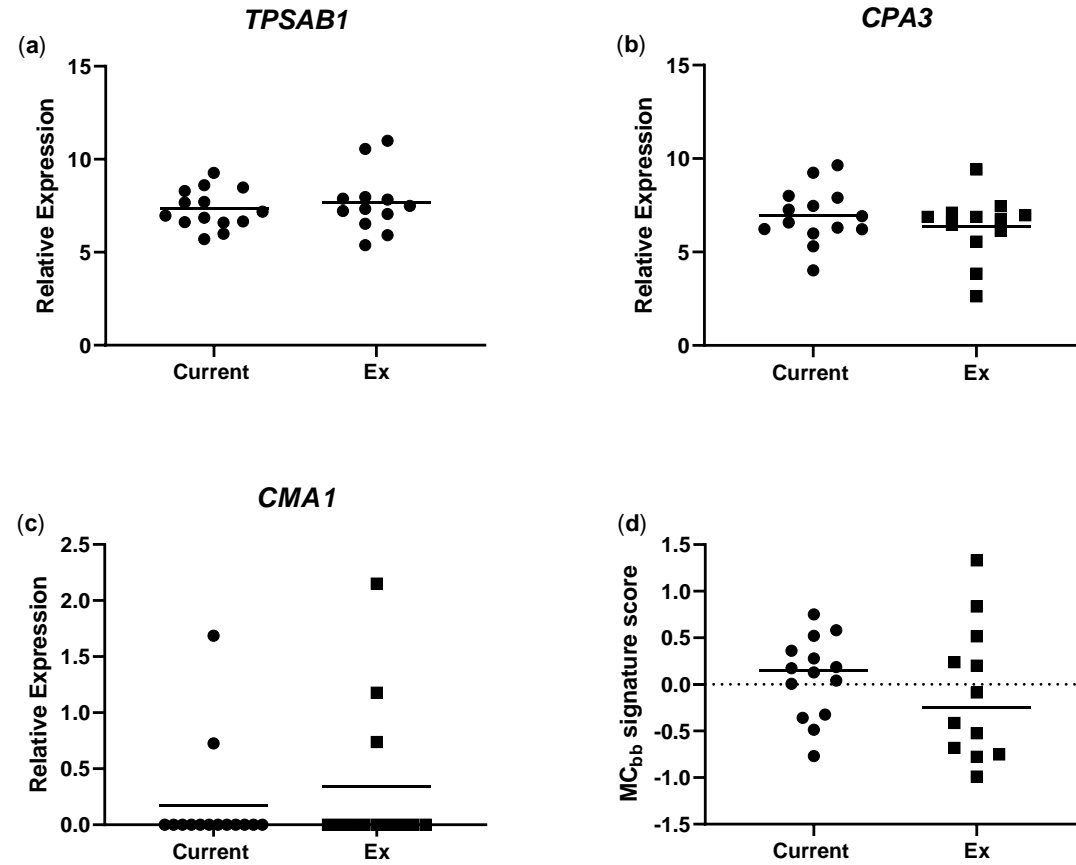

**Supplementary figure 15. Sputum mast cell gene expression in current vs ex-smokers.** RNA sequencing was used to examine the expression of

**(a) *TPSAB1*, (b) *CPA3*, (c) *CMA1*, (d) *MC<sub>bb</sub>* signature** in current smokers (n=14) vs ex-smokers (n=12). Data presented as individual values where the

black horizontal line represents the mean **(a – c)** or median **(d)**.
